# Supplementary material for: Study on the use of black phosphorus quantum dots in the treatment of atherosclerosis
Source: publisher site journal article supplement (doi:10.18632/aging.206205), 2025-02-20
Supplement: Supplementary file [file aging-v17-206205-supplementary-material-SD2.pdf]

## SUPPLEMENTARY TABLES

**Supplementary Table 1. Experimental materials and sources.**

### A. Experimental mice

| Strain                      | Age     | Body weight | Sources                           |
|-----------------------------|---------|-------------|-----------------------------------|
| C57BL / Apoe <sup>-/-</sup> | 5 weeks | 15-20g      | Guangdong Pharmaceutical Kang Co. |

### B. Experimental cells

| Cell type | Sources          |
|-----------|------------------|
| RAW264.7  | Servicebio, Inc. |
| MAEC      | Servicebio, Inc. |

**Supplementary Table 2. *In vivo* safety: grouping and administration of mice.**

| Group   | Mice (n ≥ 5) | Dosage                                 | Frequency    |
|---------|--------------|----------------------------------------|--------------|
| Control | C57BL        | 0.1 mL normal saline                   | 3 times/week |
| BPQDs   | C57BL        | 0.1 mL BPQDs in normal saline solution | 3 times/week |

**Supplementary Table 3. Model and parameters of photoacoustic microscopes.**

| Model                         | VIS-H-50, PAOMTek, China    |
|-------------------------------|-----------------------------|
| Laser output wavelength (nm)  | 523                         |
| Imaging range (mm)            | 3                           |
| Imaging speed (s/Volume)      | 5                           |
| Lateral resolution (μm)       | 4.6                         |
| Axial resolution (μm)         | 158                         |
| Applicable targets            | Mouse, Rat, Rabbit, Human   |
| Driving mode                  | Four-way differential drive |
| Operating ambient temperature | 15-35° C                    |
| Imaging probe size            | 22*30*13                    |
